# Supplementary material for: The fine-scale genetic structure of the British population
Source: Springer Nature journal article supplement (doi:10.1038/nature14230), 2015-03-01
Supplement: 41586_2015_BFnature14230_MOESM68_ESM.xlsx [file 41586_2015_BFnature14230_MOESM68_ESM.xlsx]

## Sheet: Sheet1
	Germany		Germany		Belgium		Belgium		France		France		France		Denmark		S. France/ Spain		Norway		Norway		Norway		Norway		Norway		Norway		Norway		Norway		Norway		Sweden		Sweden
	GER3		GER6		BEL7		BEL11		FRA12		FRA14		FRA17		DEN18		SFS31		NOR53		NOR61		NOR63		NOR64		NOR71		NOR72		NOR81		NOR85		NOR90		SWE117		SWE121
Westray	0.0209	(0.000-0.066)	0.1244	(0.072-0.167)	0	(0.000-0.007)	0.1181	(0.094-0.140)	0	(0.000-0.081)	0.2378	(0.211-0.272)	0.112	(0.000-0.185)	0.0513	(0.028-0.078)	0.0389	(0.017-0.059)	0.0532	(0.037-0.067)	0.0007	(0.000-0.013)	0.008	(0.000-0.014)	0.0458	(0.000-0.0712)	0.0022	(0.000-0.0222)	0	(0.000-0.020)	0.0185	(0.011-0.026)	0.0258	(0.000-0.056)	0.081	(0.034-0.124)	0.0372	(0.003-0.072)	0.0242	(0.000-0.059)
Orkney1	0.0108	(0.000-0.045)	0.1429	(0.104-0.174)	0.0104	(0.000-0.021)	0.0585	(0.037-0.086)	0.0078	(0.000-0.128)	0.2197	(0.199-0.252)	0.1885	(0.000-0.243)	0.0612	(0.043-0.080)	0.0185	(0.000-0.031)	0.0503	(0.041-0.061)	0	(0.000-0.000)	0.013	(0.008-0.019)	0.0448	(0.0074-0.0628)	0	(0.000-0.0116)	0.002	(0.000-0.021)	0.0177	(0.012-0.023)	0.0115	(0.000-0.034)	0.0977	(0.061-0.122)	0.0122	(0.000-0.039)	0.0323	(0.007-0.054)
Orkney2	0	(0.000-0.052)	0.1768	(0.110-0.220)	0	(0.000-0.017)	0.0764	(0.036-0.102)	0	(0.000-0.076)	0.215	(0.176-0.256)	0.1969	(0.071-0.293)	0.0804	(0.050-0.112)	0.0291	(0.000-0.056)	0.0473	(0.030-0.064)	0	(0.000-0.003)	0.007	(0.000-0.016)	0.046	(0.000-0.0763)	0	(0.000-0.0208)	0.0098	(0.000-0.041)	0.0111	(0.004-0.020)	0.0142	(0.000-0.048)	0.0617	(0.007-0.095)	0.0029	(0.000-0.036)	0.0255	(0.000-0.047)
NE Scotland 1	0.0442	(0.000-0.105)	0.1543	(0.080-0.228)	0	(0.000-0.000)	0.1211	(0.085-0.159)	0	(0.000-0.009)	0.1864	(0.145-0.233)	0.2086	(0.076-0.313)	0.0733	(0.039-0.107)	0.0468	(0.020-0.078)	0.026	(0.007-0.042)	0.0075	(0.000-0.021)	0	(0.000-0.008)	0.007	(0.000-0.0357)	0.0065	(0.000-0.0218)	0	(0.000-0.000)	0.0154	(0.008-0.021)	0.0054	(0.000-0.030)	0.0426	(0.001-0.059)	0	(0.000-0.018)	0.0548	(0.028-0.076)
NE Scotland 2	0	(0.000-0.038)	0.203	(0.156-0.231)	0.0099	(0.000-0.022)	0.0852	(0.056-0.114)	0	(0.000-0.122)	0.2409	(0.218-0.279)	0.2094	(0.021-0.268)	0.0682	(0.048-0.088)	0.0269	(0.007-0.041)	0.0218	(0.012-0.032)	0.0084	(0.000-0.017)	0.0042	(0.000-0.009)	0.0233	(0.000-0.0452)	0.0107	(0.000-0.0241)	0	(0.000-0.001)	0.0071	(0.003-0.011)	0.0059	(0.000-0.021)	0.0291	(0.005-0.045)	0.0016	(0.000-0.028)	0.0444	(0.019-0.058)
N Ire./ W Scotland	0	(0.000-0.000)	0.1276	(0.099-0.159)	0	(0.000-0.003)	0.0575	(0.037-0.080)	0.0504	(0.000-0.177)	0.3212	(0.289-0.360)	0.1739	(0.000-0.297)	0.028	(0.011-0.049)	0.0285	(0.007-0.046)	0.0282	(0.015-0.042)	0.0213	(0.010-0.032)	0.0056	(0.000-0.012)	0.0417	(0.000-0.0664)	0.0122	(0.000-0.0303)	0	(0.000-0.015)	0.0185	(0.013-0.024)	0.0217	(0.006-0.035)	0.0206	(0.000-0.047)	0.0156	(0.000-0.045)	0.0276	(0.000-0.052)
N Ire./ S Scotland	0.0155	(0.000-0.044)	0.2207	(0.187-0.252)	0.0011	(0.000-0.012)	0.0934	(0.070-0.110)	0.0598	(0.000-0.128)	0.2534	(0.228-0.277)	0.0845	(0.000-0.198)	0.076	(0.059-0.091)	0.0403	(0.026-0.054)	0.0233	(0.016-0.029)	0.0022	(0.000-0.009)	0.0112	(0.007-0.015)	0.0045	(0.000-0.0241)	0.0152	(0.0046-0.0218)	0	(0.000-0.000)	0.0089	(0.006-0.012)	0	(0.000-0.004)	0.0421	(0.034-0.048)	0.0169	(0.000-0.035)	0.0311	(0.010-0.051)
Northumbria	0.0293	(0.009-0.051)	0.211	(0.185-0.235)	0	(0.000-0.008)	0.1129	(0.096-0.123)	0	(0.000-0.008)	0.1683	(0.154-0.183)	0.2244	(0.189-0.259)	0.1047	(0.092-0.117)	0.0255	(0.015-0.034)	0.0171	(0.011-0.022)	0.0005	(0.000-0.006)	0.0054	(0.002-0.008)	0.0143	(0.000-0.0311)	0.0088	(0.0008-0.0152)	0	(0.000-0.005)	0.0068	(0.005-0.009)	0.0029	(0.000-0.010)	0.0176	(0.006-0.025)	0.025	(0.009-0.040)	0.0254	(0.010-0.042)
Cumbria	0.0417	(0.022-0.062)	0.2053	(0.181-0.231)	0.0101	(0.002-0.018)	0.0811	(0.066-0.098)	0	(0.000-0.051)	0.166	(0.154-0.183)	0.2473	(0.162-0.278)	0.1036	(0.092-0.116)	0.0215	(0.012-0.030)	0.0139	(0.008-0.020)	0.0054	(0.000-0.010)	0.0068	(0.004-0.010)	0.0096	(0.000-0.0224)	0.0032	(0.000-0.0094)	0	(0.000-0.000)	0.0064	(0.002-0.008)	0	(0.000-0.006)	0.028	(0.017-0.032)	0.0215	(0.007-0.036)	0.0286	(0.012-0.043)
W Yorkshire	0.0829	(0.055-0.114)	0.2484	(0.211-0.287)	0.0069	(0.000-0.018)	0.1088	(0.086-0.130)	0	(0.000-0.053)	0.1224	(0.104-0.143)	0.1802	(0.090-0.229)	0.1184	(0.102-0.137)	0.0213	(0.010-0.035)	0.0053	(0.000-0.012)	0.0024	(0.000-0.008)	0.0034	(0.000-0.007)	0.0209	(0.000-0.0309)	0.0017	(0.000-0.0133)	0	(0.000-0.006)	0.0063	(0.004-0.009)	0.0006	(0.000-0.008)	0.0118	(0.000-0.018)	0.0146	(0.000-0.035)	0.0402	(0.017-0.060)
N Wales	0	(0.000-0.000)	0.3243	(0.303-0.347)	0.0046	(0.000-0.013)	0.0546	(0.038-0.070)	0.0317	(0.002-0.063)	0.3828	(0.365-0.401)	0	(0.000-0.000)	0.0362	(0.024-0.052)	0.0706	(0.056-0.085)	0.0248	(0.018-0.031)	0.0009	(0.000-0.006)	0.0018	(0.000-0.005)	0.0144	(0.000-0.0252)	0.0034	(0.000-0.0119)	0.001	(0.000-0.011)	0.0074	(0.005-0.010)	0.0032	(0.000-0.012)	0.0153	(0.000-0.024)	0.0027	(0.000-0.020)	0.0202	(0.000-0.030)
Cent./ S England	0.1043	(0.097-0.112)	0.1621	(0.152-0.171)	0.0046	(0.001-0.008)	0.09	(0.084-0.096)	0	(0.000-0.000)	0.0898	(0.085-0.095)	0.3359	(0.345-0.348)	0.1133	(0.109-0.117)	0.0115	(0.003-0.015)	0.0079	(0.006-0.010)	0.0008	(0.000-0.003)	0.0037	(0.003-0.005)	0.0001	(0.000-0.0055)	0.0086	(0.0061-0.0102)	0	(0.000-0.000)	0.0025	(0.002-0.003)	0.0015	(0.000-0.004)	0.012	(0.008-0.014)	0.0142	(0.008-0.019)	0.0372	(0.033-0.043)
N Pembrokeshire	0	(0.000-0.000)	0.2776	(0.238-0.318)	0	(0.000-0.010)	0.0632	(0.036-0.085)	0.0841	(0.000-0.130)	0.4025	(0.370-0.436)	0	(0.000-0.031)	0.0402	(0.018-0.063)	0.0498	(0.029-0.083)	0.0149	(0.003-0.022)	0	(0.000-0.009)	0.0026	(0.000-0.007)	0	(0.000-0.000)	0.0121	(0.0028-0.0202)	0	(0.000-0.003)	0.0051	(0.001-0.010)	0.0106	(0.000-0.016)	0.0023	(0.000-0.021)	0.0326	(0.006-0.045)	0.0023	(0.000-0.031)
Welsh Borders	0.0909	(0.065-0.115)	0.1884	(0.155-0.224)	0.0069	(0.000-0.015)	0.0775	(0.059-0.095)	0	(0.000-0.027)	0.1844	(0.168-0.203)	0.2544	(0.197-0.292)	0.1008	(0.087-0.116)	0.0215	(0.011-0.032)	0.0089	(0.004-0.014)	0	(0.000-0.002)	0.003	(0.000-0.006)	0.0056	(0.000-0.0186)	0.0072	(0.000-0.0129)	0	(0.000-0.000)	0.0042	(0.002-0.006)	0	(0.000-0.006)	0.014	(0.004-0.018)	0.0061	(0.000-0.021)	0.0259	(0.002-0.037)
S Pembrokeshire	0	(0.000-0.000)	0.2582	(0.219-0.288)	0	(0.000-0.009)	0.108	(0.081-0.126)	0.081	(0.000-0.115)	0.3505	(0.313-0.372)	0	(0.000-0.154)	0.0736	(0.054-0.092)	0.0525	(0.035-0.075)	0.0138	(0.005-0.020)	0	(0.000-0.004)	0.0017	(0.000-0.006)	0	(0.000-0.0097)	0.0117	(0.002-0.018)	0	(0.000-0.005)	0.0045	(0.001-0.008)	0.0082	(0.000-0.016)	0.011	(0.000-0.025)	0	(0.000-0.018)	0.0251	(0.000-0.035)
Devon	0.1114	(0.086-0.137)	0.1168	(0.087-0.150)	0.0117	(0.036-0.021)	0.072	(0.053-0.093)	0	(0.000-0.056)	0.1648	(0.147-0.185)	0.3204	(0.233-0.367)	0.1109	(0.095-0.125)	0.0263	(0.014-0.038)	0.0038	(0.000-0.010)	0.0037	(0.000-0.008)	0.004	(0.001-0.007)	0	(0.000-0.0033)	0.0003	(0.000-0.0058)	0	(0.000-0.003)	0.0021	(0.000-0.004)	0.0013	(0.000-0.008)	0.0103	(0.000-0.015)	0.0095	(0.000-0.024)	0.0309	(0.015-0.047)
Cornwall	0.0763	(0.051-0.103)	0.1171	(0.087-0.148)	0.0039	(0.000-0.014)	0.063	(0.043-0.082)	0	(0.000-0.077)	0.2446	(0.226-0.272)	0.3288	(0.207-0.367)	0.092	(0.078-0.106)	0.0249	(0.011-0.036)	0.0017	(0.000-0.008)	0.0054	(0.001-0.009)	0.0037	(0.001-0.007)	0	(0.000-0.003)	0.0029	(0.000-0.0084)	0	(0.000-0.000)	0.0019	(0.000-0.004)	0.0072	(0.001-0.012)	0.0043	(0.000-0.014)	0.0153	(0.000-0.026)	0.007	(0.000-0.024)
Supplementary Table 4
